# Supplementary material
Source: PubMed Central journal article supplement (PMC8321571)
Supplement: jci-131-138022-s100.pdf [file jci-131-138022-s100.pdf]

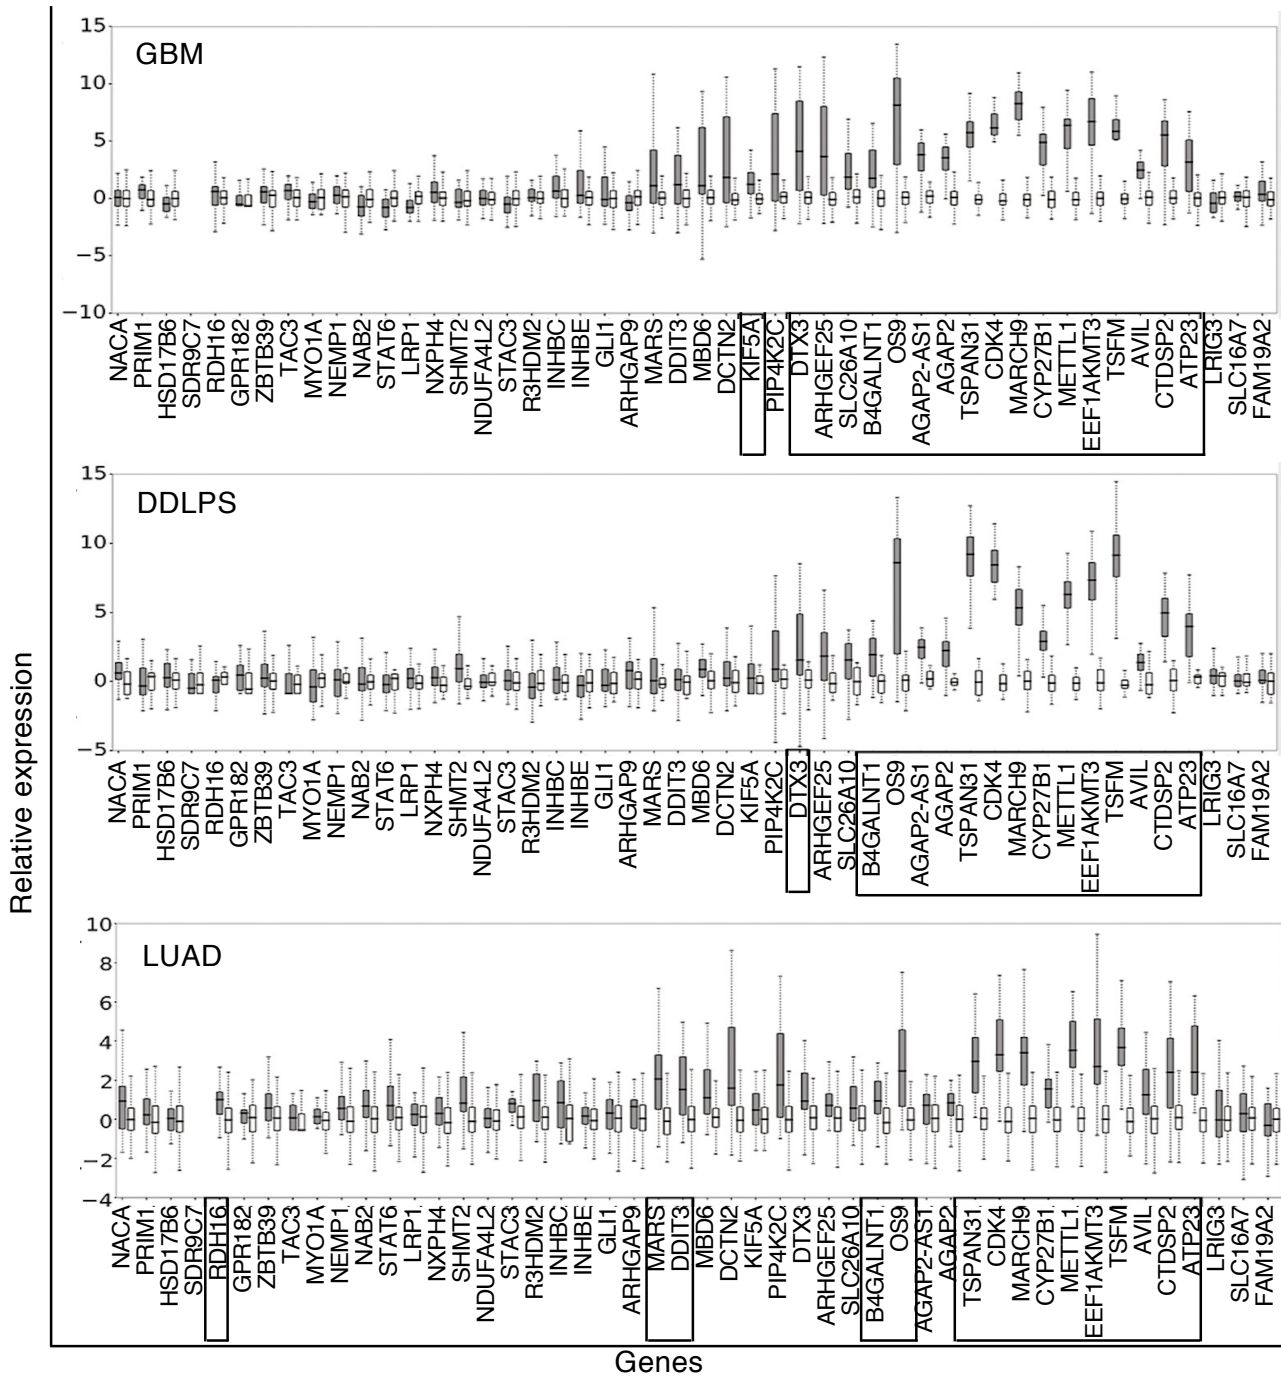

**Supplemental Figure 1. Expression levels of genes in the 12q13-q14 region.** Genes in and around the 12q13-q14 amplicon were analyzed for significant differences in gene expression between amplicon-positive (grey) and amplicon-negative (white) samples. Genes that had Bonferroni-corrected p-values  $\leq 0.05$  and fold changes  $\geq 2.0$  are indicated with black rectangles.

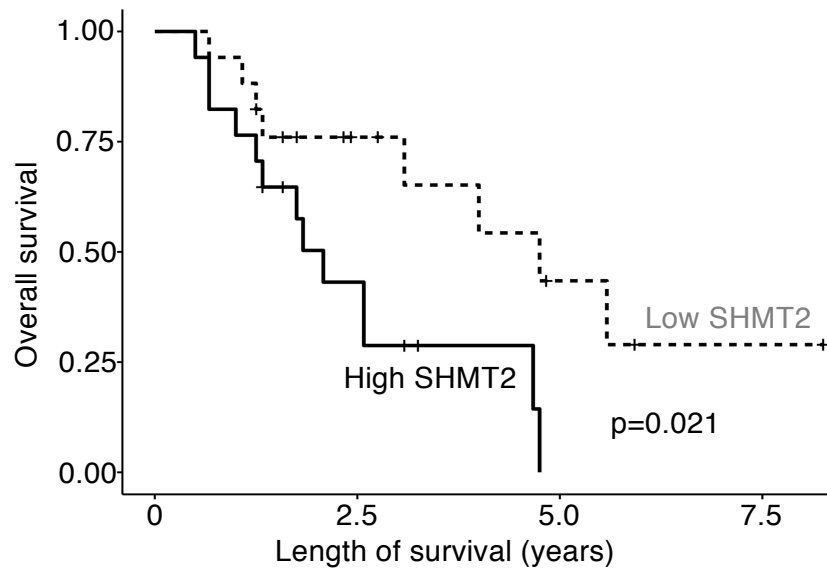

**Supplemental Figure 2. Relationship of SHMT2 mRNA expression to overall survival in patients with FP RMS.** Using expression microarray data (11), 34 FP-RMS tumors were stratified into low and high SHMT2 groups based on the median expression level of SHMT2 mRNA. The overall survival of patients with FP-RMS with high (n=17) versus low (n=17) SHMT2 expression was then compared. The p-value shown was calculated by the log-rank test.

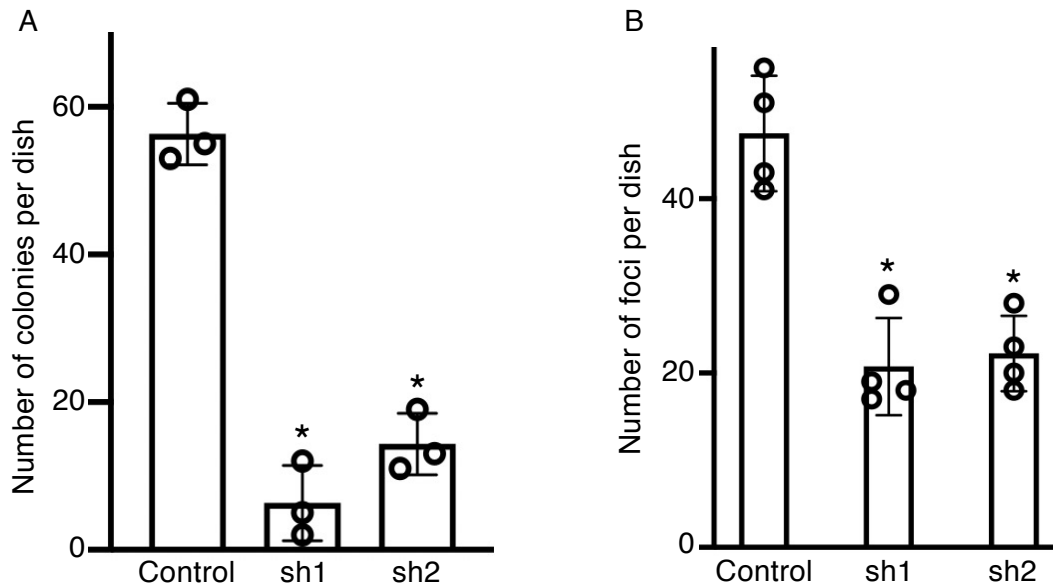

**Supplemental Figure 3. Effect of SHMT2 knockdown on colony (A) and focus (B) formation of Rh30 cells.** As described in Figure 6E-F, control or shRNA-expressing cells were cultured for 3 weeks with (A) or without (B) NIH 3T3 cells, and then fixed and stained with Giemsa. Counting in A (3 replicates) and B (4 replicates) was performed using ImageJ software (NIH) and displayed as the mean  $\pm$  SD. Dunnett's multiple comparisons test was used for statistical analysis of differences between control and shRNA-expressing cells; an asterisk (\*) indicates  $p < 0.001$ .

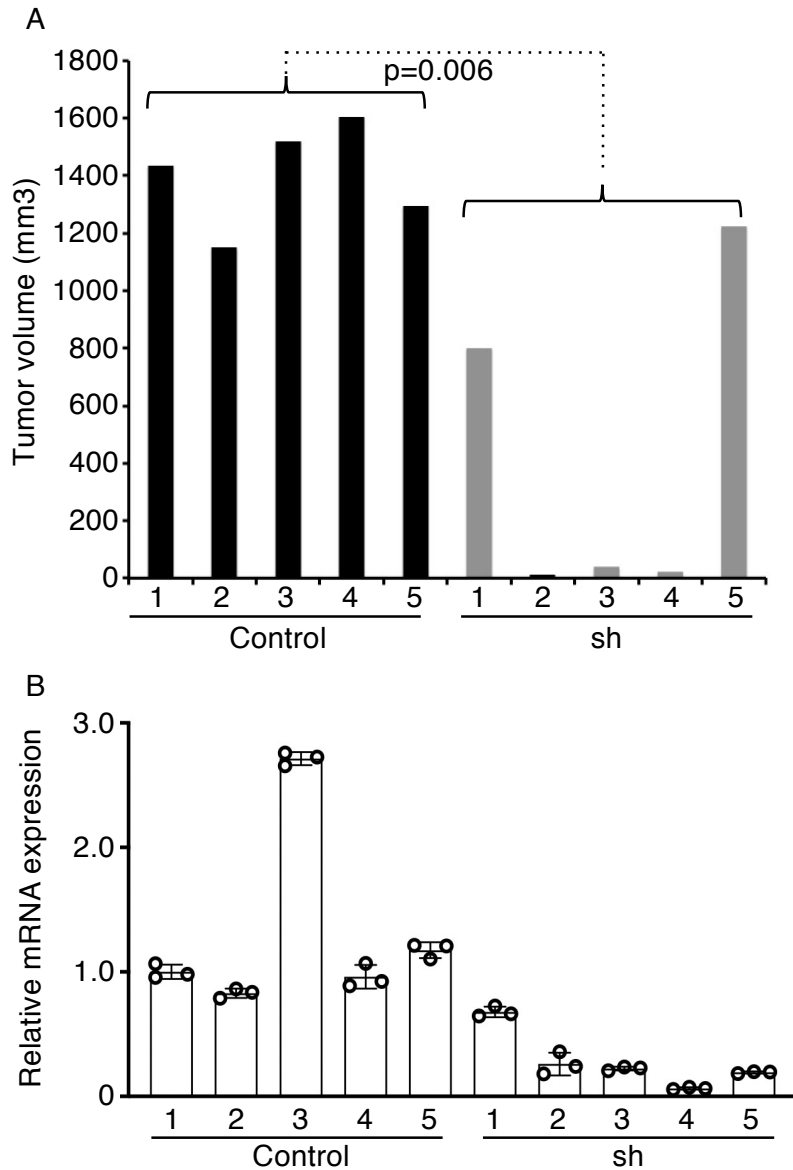

**Supplemental Figure 4. Intramuscular xenograft tumor formation of control or SHMT2 shRNA-expressing Rh30 cells.** (A). *Tumor volume.* Tumors (shown in Figure 6G) were excised and volumes were measured by the formula (width<sup>2</sup> x length)/2. Statistical analysis of differences in tumor volumes of control versus shRNA-expressing tumors was performed using the Student's *t*-test (2 tailed, type 2). (B) *Quantitation of SHMT2 mRNA expression in excised tumors.* The relative SHMT2 mRNA expression in each control or SHMT2 shRNA-expressing tumor was determined by qRT-PCR, using GAPDH for normalization. Data represent mean ± SD of 3 replicates. The tumor numbers in parts A and B refer to the tumors shown in Figure 6G.

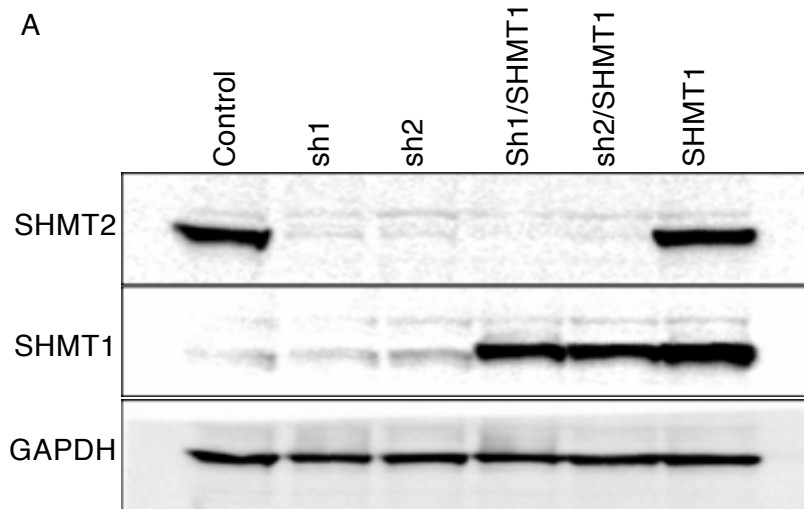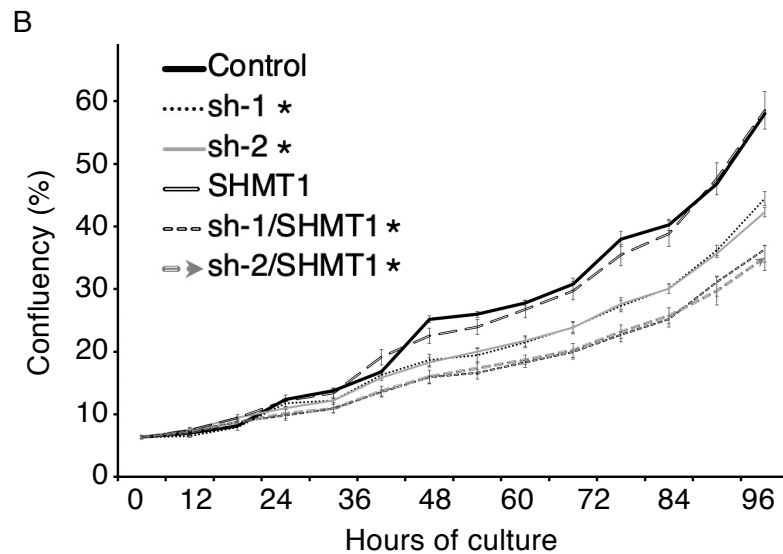

**Supplemental Figure 5. Effect of SHMT1 on Rh30 cell growth.** (A) *Western blot analysis of SHMT1 and SHMT2 expression.* Immunoblots of Rh30 cells expressing the indicated genetic elements were probed with specific antibodies against SHMT1 and SHMT2. GAPDH was used as a loading control. (B). *IncuCyte assay.* Data indicate mean confluency  $\pm$  SE of 4 different wells. ANOVA tests with correction for multiple comparisons using the Sidak-Bonferroni method were performed for the last 6 time points. An asterisk (\*) indicates  $p < 0.05$  when compared with Rh30-control cells. Experiments were repeated twice, and representative data are shown.

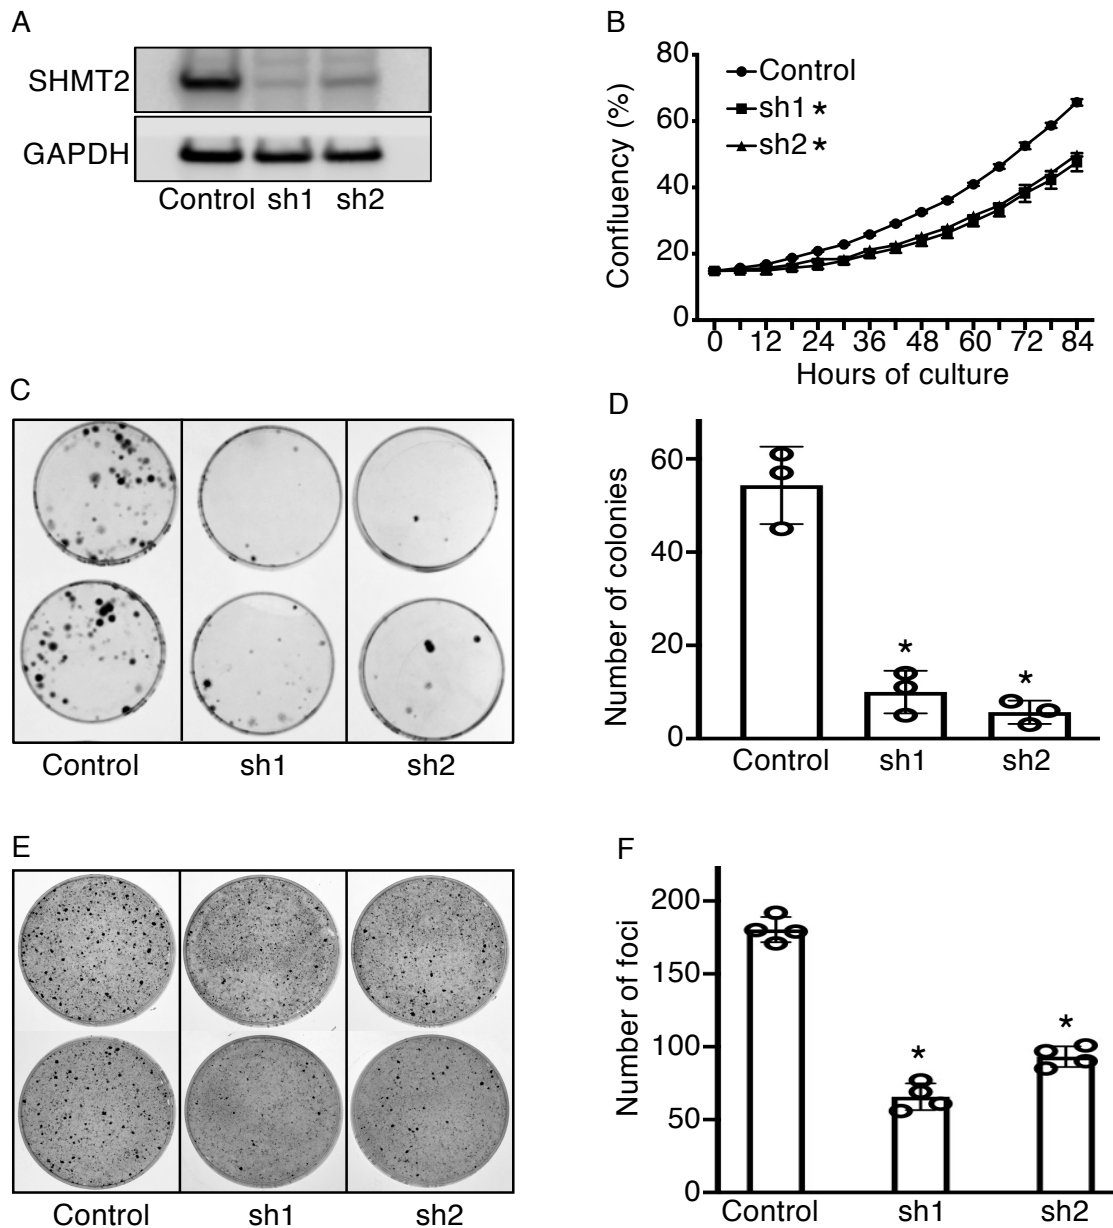

**Supplemental Figure 6. Effect of SHMT2 knockdown in Rh41 cells.** (A) *Western blot analysis of SHMT2 expression of control and shRNA-expressing cells.* GAPDH was used as a loading control. (B) *Growth assay.* Data indicate mean confluency values  $\pm$  SE of 4 different wells. ANOVA tests with correction for multiple comparisons using the Sidak-Bonferroni method were performed for the last 6 time points. An asterisk (\*) indicates  $p < 0.01$ . (C) *Clonogenic assay and* (D) *colony counting.* 360 cells were seeded in 6-cm dishes, grown for 3 weeks, and then fixed and stained with Giemsa. (E) *Focus formation assay and* (F) *counting.* 500 cells were co-cultured with  $2 \times 10^5$  NIH 3T3 fibroblasts for 4 weeks, and then fixed and stained with Giemsa. Counting in D (3 replicates) and F (4 replicates) was performed using the ImageJ software (NIH). Experiments were repeated at least twice, and representative data are shown. In D and F, Dunnett's multiple comparisons test was used for statistical analysis of differences between control and shRNA-expressing cells; an asterisk (\*) indicates  $p < 0.001$ .

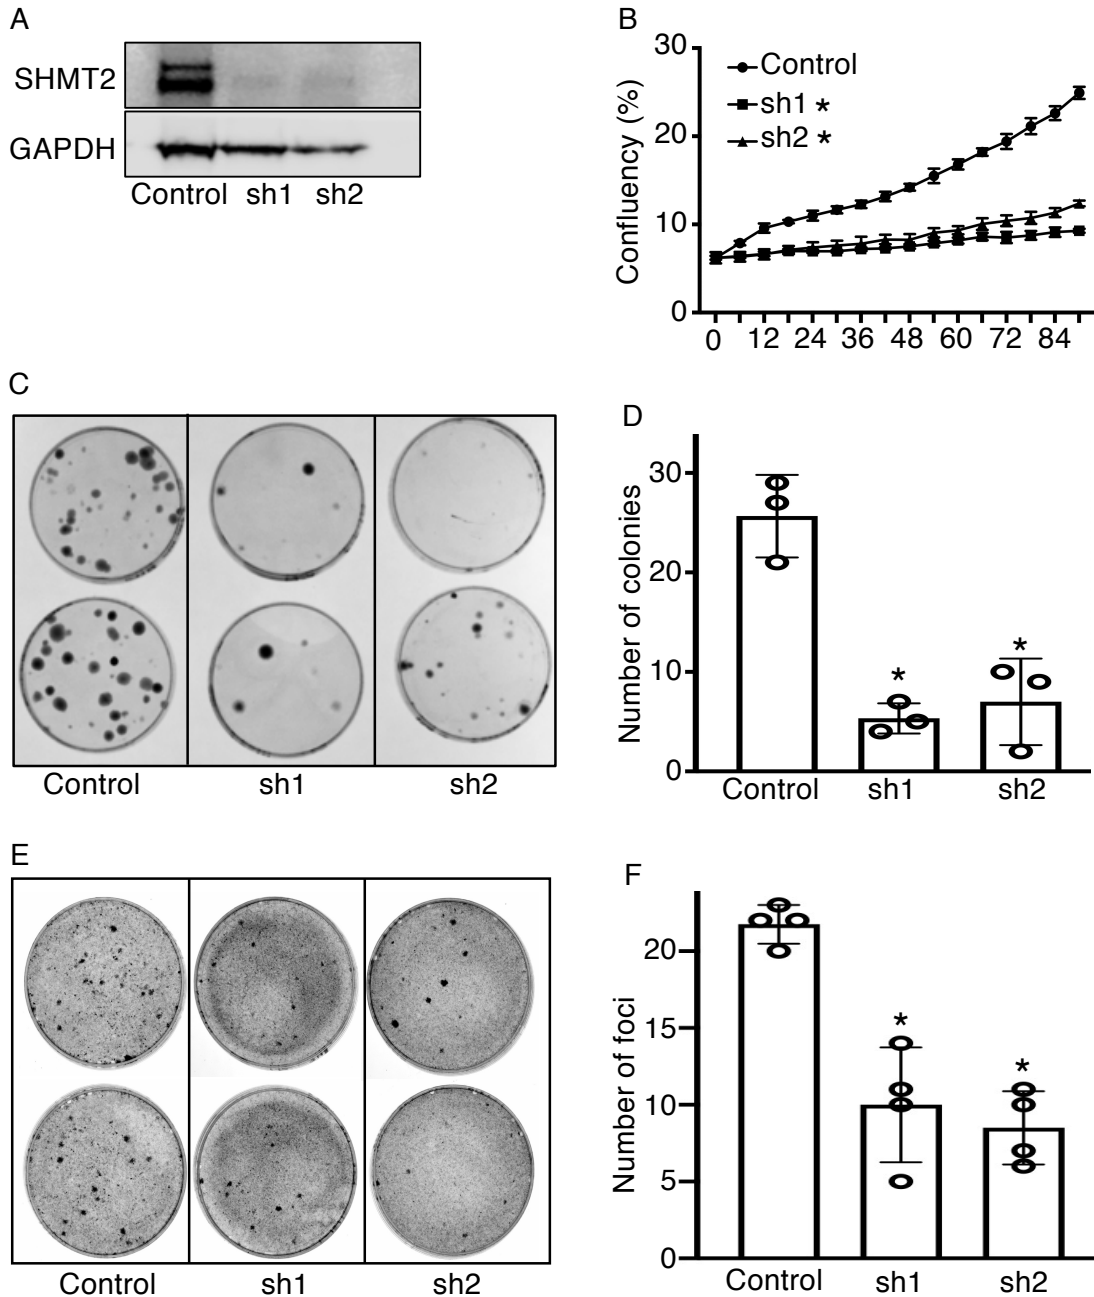

**Supplemental Figure 7. Effect of SHMT2 knockdown in Rh5 cells.** (A) Western blot analysis of SHMT2 expression in Rh5 cells expressing control or SHMT2 shRNAs. GAPDH was used as a loading control. (B) IncuCyte assay. Data indicate mean confluency values  $\pm$  SE of 4 different wells. ANOVA tests (corrected for multiple comparisons using the Sidak-Bonferroni method) were performed for the last 6 time points. An asterisk (\*) indicates an adjusted  $p < 0.01$ . (C) Clonogenic assay and (D) colony counting. 500 cells were seeded in 6-cm dishes, grown for 3 weeks, and then fixed and stained with Giemsa. (E) Focus formation assay and (F) focus counting.  $10^3$  cells expressing control or shRNAs were co-cultured in 6-cm dish with  $2 \times 10^5$  NIH 3T3 fibroblasts for 5 weeks, and then fixed and stained with Giemsa. Counting in D (3 replicates) and F (4 replicates) was performed using the ImageJ software (NIH). Experiments were repeated at least twice, and representative data are shown. In D and F, Dunnett's multiple comparisons test was used for statistical analysis of differences between control and shRNA-expressing cells; an asterisk (\*) indicates  $p < 0.01$ .

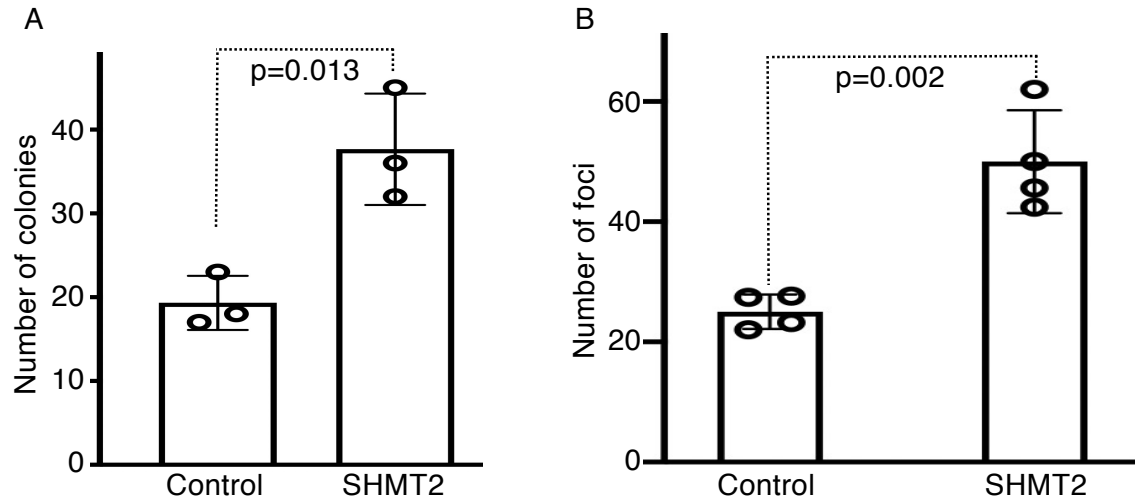

**Supplemental Figure 8. Effect of SHMT2 expression on colony (A) and focus (B) formation in Rh41 cells.** As previously described in Figure 7D-E, control (empty vector) or SHMT2-expressing cells were cultured for 3 weeks (colony) or 4 weeks (focus), and then fixed and stained with Giemsa. Colony and focus counting were performed using the ImageJ software (NIH). Data represent 3 replicates in A and 4 replicates in B  $\pm$  SD. In B, the 4 replicates consisted of 2 dishes with 500 and 2 dishes with 1,000 tested cells, and counting results were normalized for 500 input cells. Student's *t*-test was used for statistical analysis.



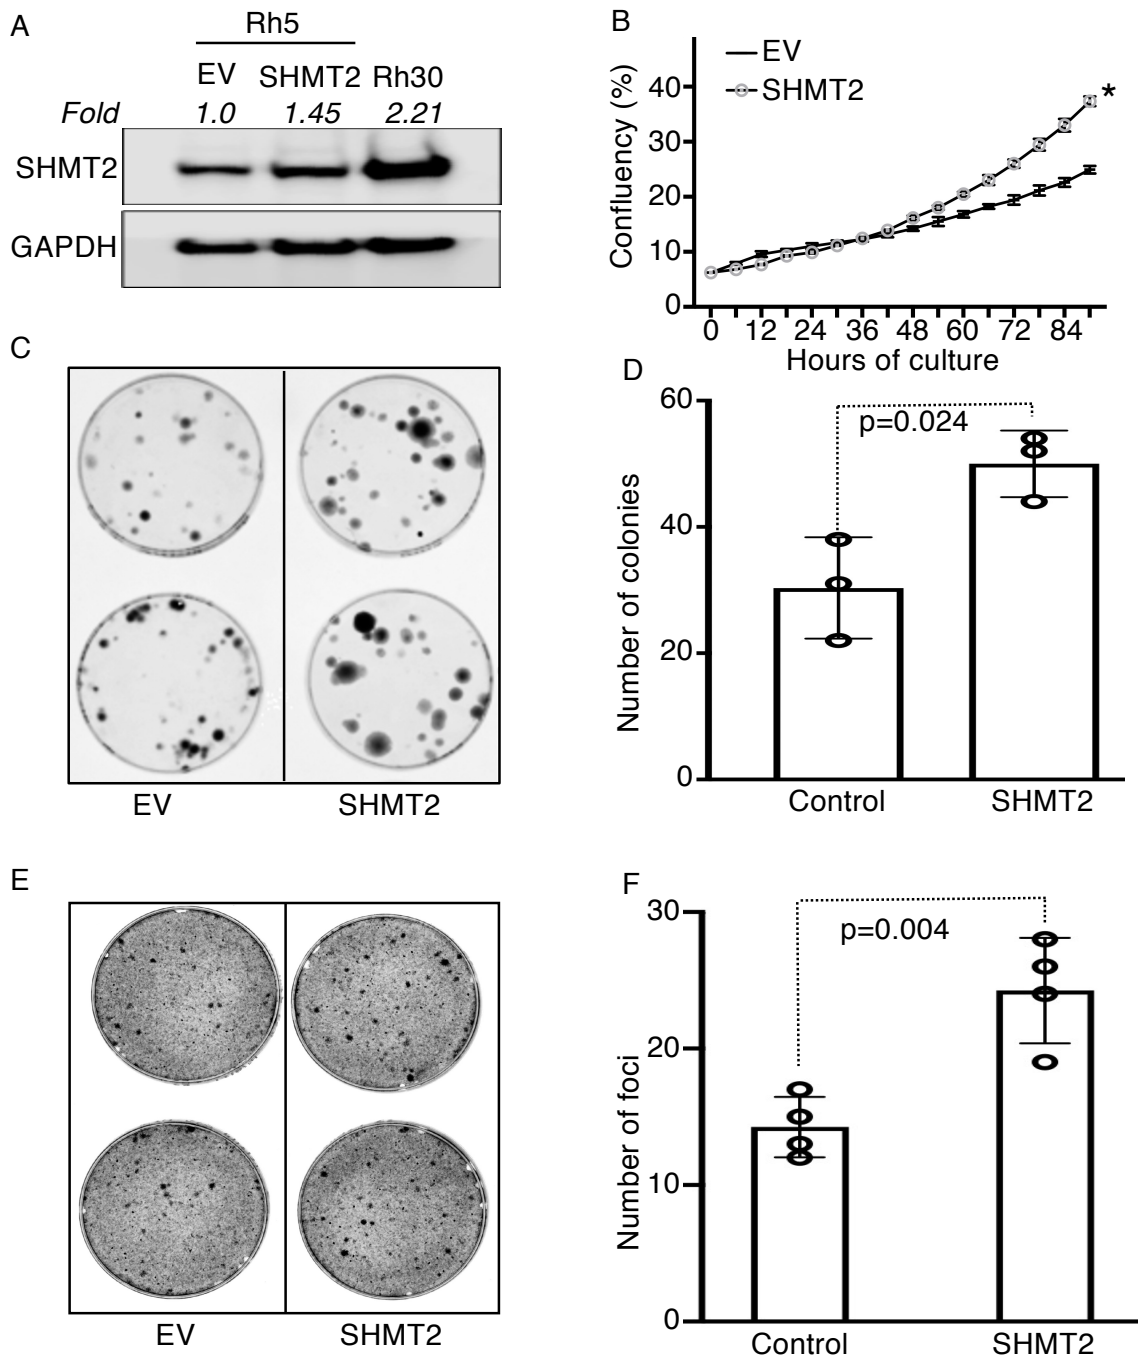

**Supplemental Figure 9. Effect of SHMT2 overexpression on Rh5 cell growth and transformation.** (A) *Western blot analysis of SHMT2 protein expression in Rh5 cells.* Immunoblots show SHMT2 expression in control or SHMT2-expressing Rh5 cells. Rh30 cells were used for comparison and GAPDH was used as a loading control. Expression was quantified as described in Figure 5. (B) *Growth assay.* Data indicate mean confluency values  $\pm$  SE of 4 different wells. Multiple t tests (correct for multiple comparisons using the Sidak-Bonferroni method) were performed for the last 6 time points to assess the significance in growth differences and asterisk (\*) indicates an adjusted  $p < 0.05$ . (C) *Clonogenic assay and* (D) *counting.* 500 cells were seeded in 6-cm dishes, grown for 3 weeks, and then fixed with methanol and stained with Giemsa. (E) *Focus formation assay and* (F) *counting.* 1000 cells were co-cultured with  $2 \times 10^5$  NIH 3T3 fibroblasts in 6-cm dishes, and then fixed and stained after 4 weeks. Counting in D (3 replicates) and F (4 replicates) was performed using the ImageJ software (NIH). Experiments were repeated twice, and representative data are shown.

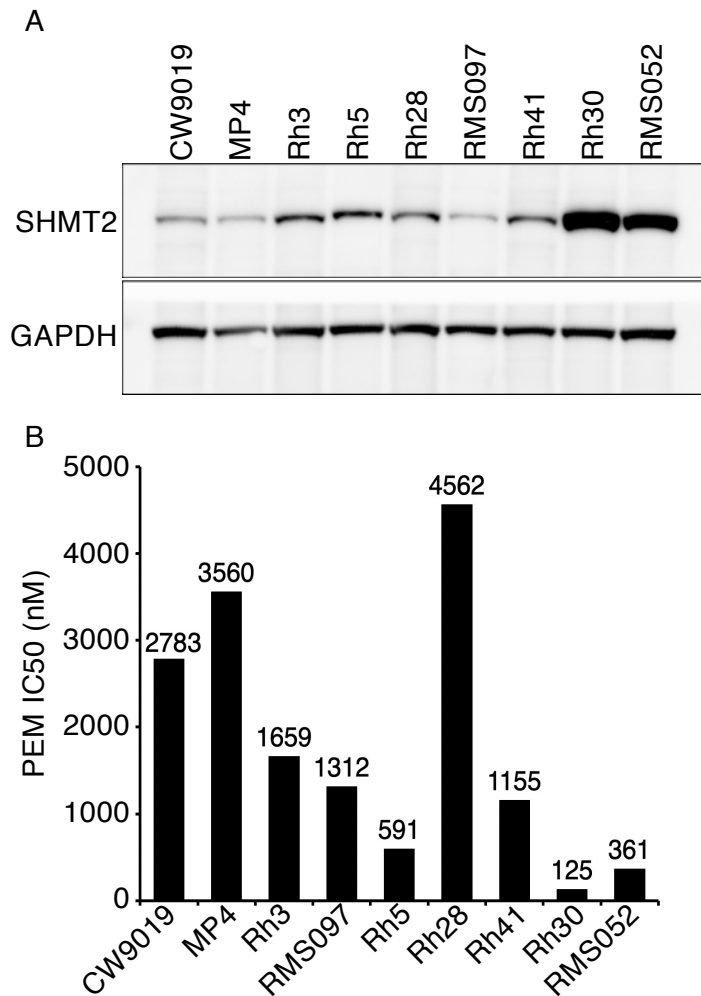

**Supplemental Figure 10. Comparison of the FP RMS line RMS052 with other FP RMS cell lines.** (A) Expression of SHMT2 FP RMS cell lines. The immunoblot was probed with SHMT2 antibody, stripped and reprobbed with GAPDH antibody for loading control. (B) IC<sub>50</sub> of PEM in RMS cell lines. The assay was performed as described in Figure 8 with PEM concentrations ranging from 50 to 6400 nM.

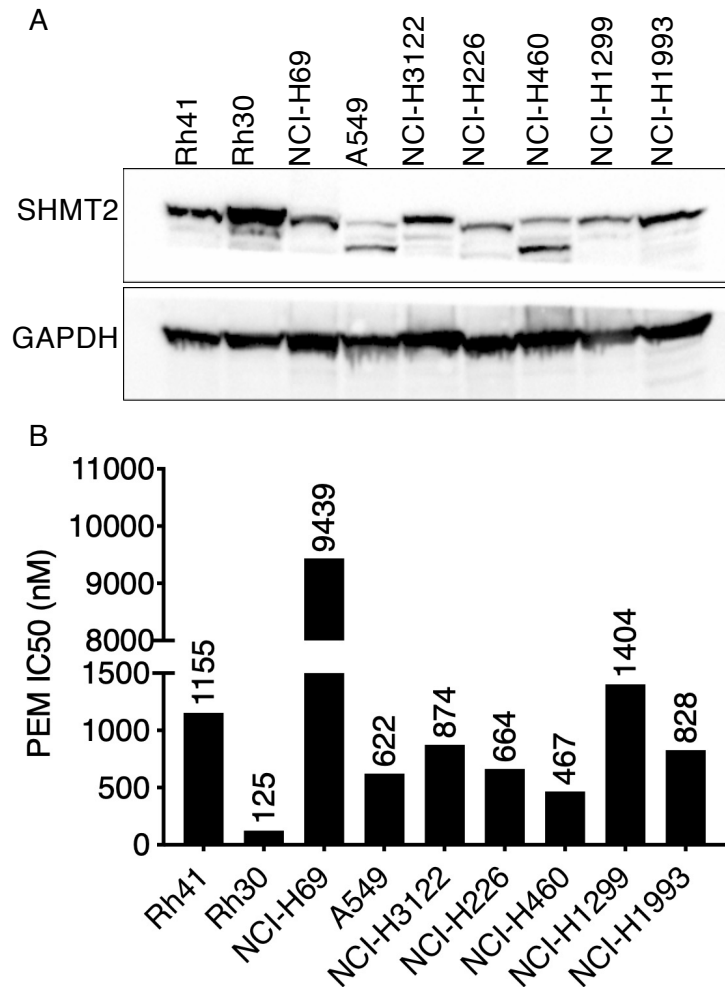

**Supplemental Figure 11. Expression of SHMT2 and PEM IC50 in RMS and lung cancer cell lines.** (A) *Protein expression of SHMT2.* The immunoblot was probed with SHMT2 antibody, stripped and reprobed with GAPDH antibody for loading control. (B) *IC50 of PEM.* The assay was performed as described in Figure 8 with PEM concentrations ranging from 100 to 6400 nM. All cell lines were assayed under the same experimental conditions.
